# Supplementary material for: Evaluating the accuracy of gridded water resources reanalysis and evapotranspiration products for assessing water security in poorly gauged basins
Source: Copernicus journal article supplement (doi:10.5194/hess-26-5899-2022), 2022-11-25

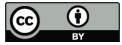

*Supplement of*

**Evaluating the accuracy of gridded water resources  
reanalysis and evapotranspiration products for  
assessing water security in poorly gauged basins**

**Elias Nkiaka et al.**

*Correspondence to:* Elias Nkiaka (e.nkiaka@sheffield.ac.uk)

The copyright of individual parts of the supplement might differ from the article licence.

**Figure S1:** Precipitation Estimates from CHIRPS, GPM, PERSIANN-CDR, and their ensemble mean used in the study

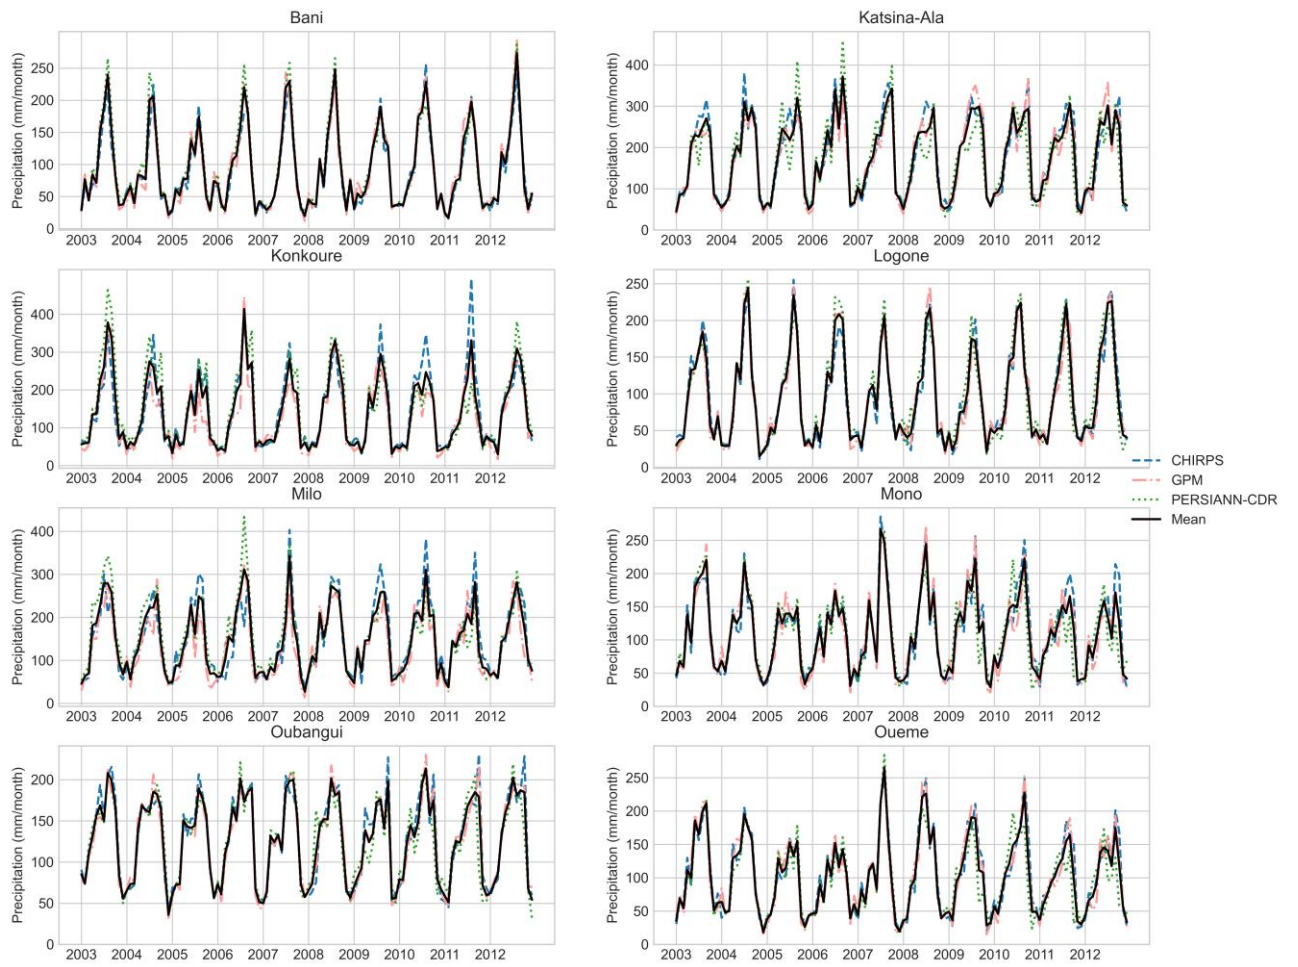

**Figure S2:** GRACE estimates from CSR, JPL, GSFC and their ensemble mean used in the study

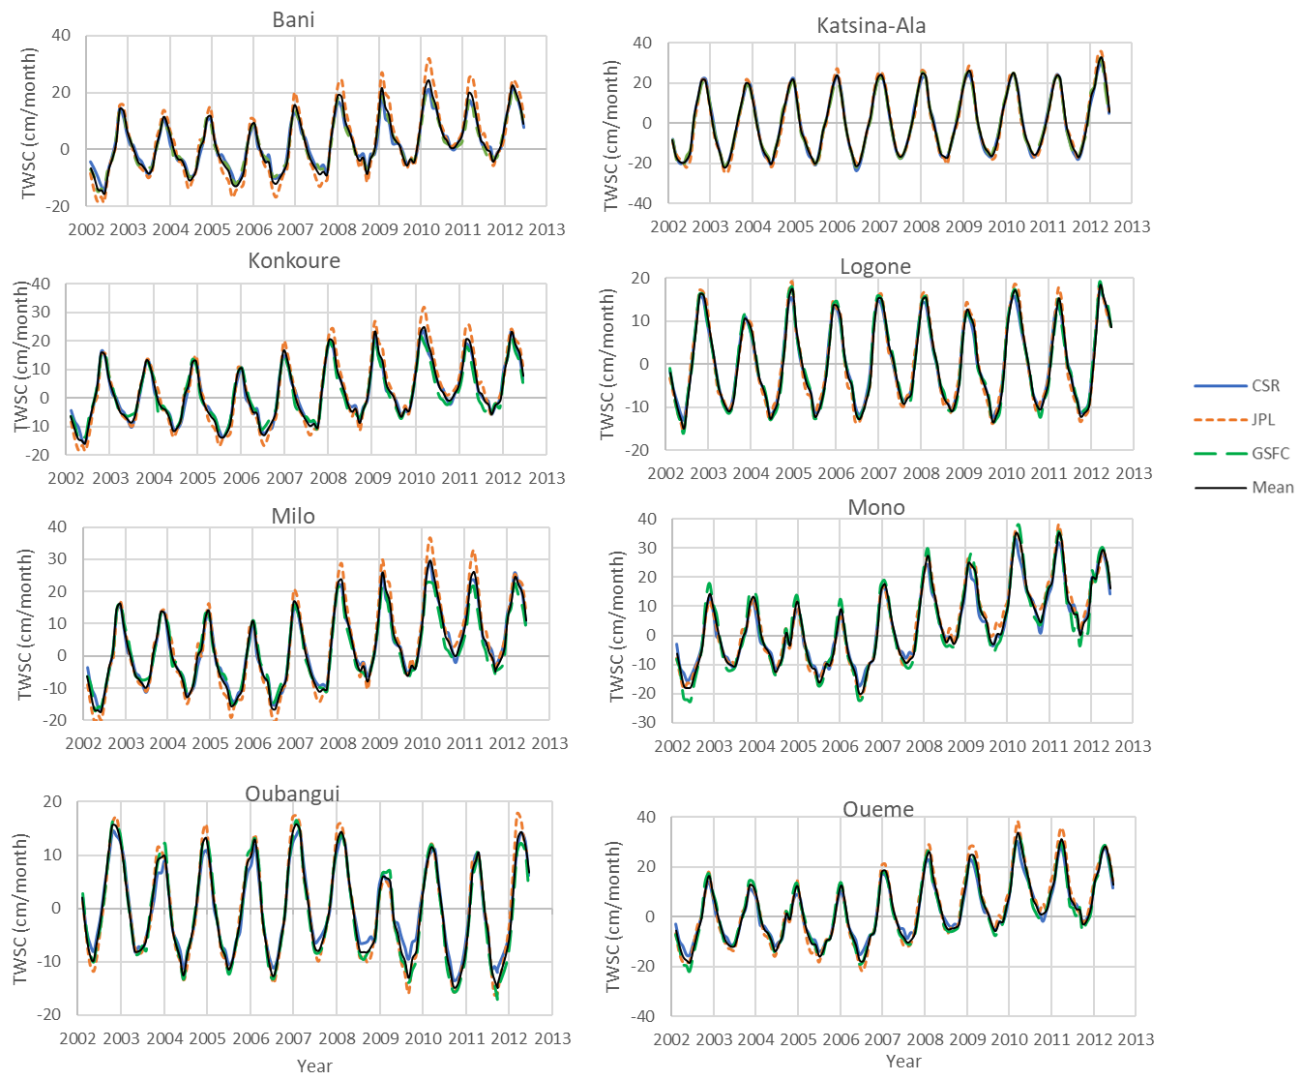

Supplement: Supplementary file 1 [file hess-26-5899-2022-supplement.pdf]
